# Supplementary material
Source: PubMed Central journal article supplement (PMC3752777)

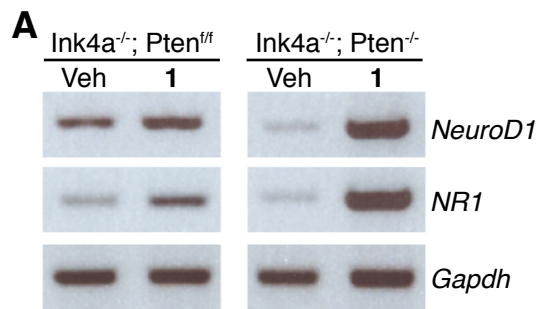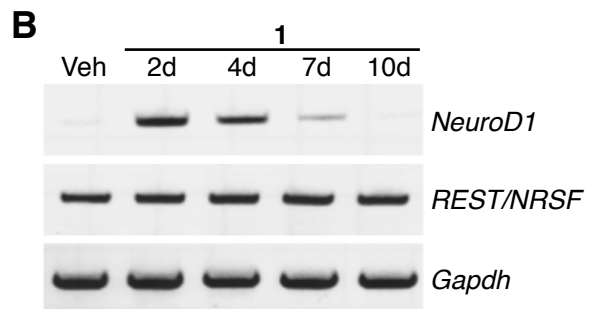

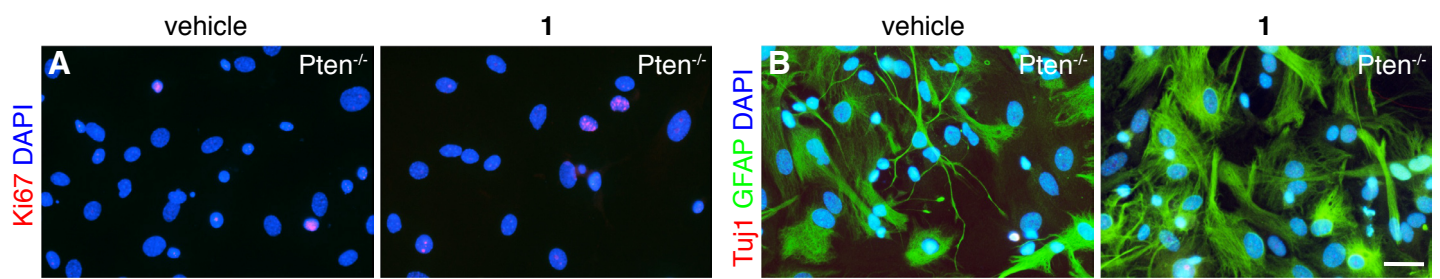

Figure S2

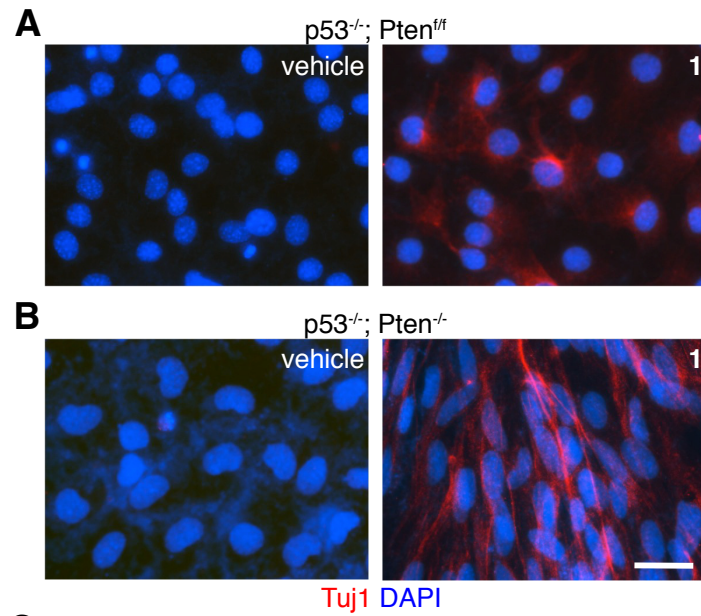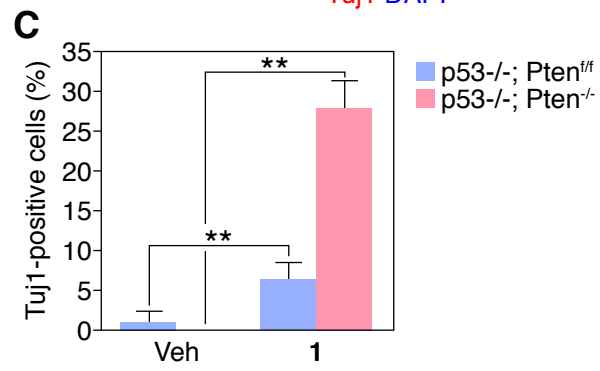

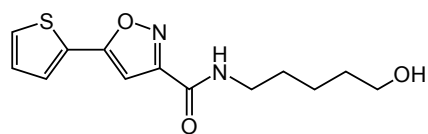

N-(5-hydroxypentyl)-5-(thiophen-2-yl)isoxazole-3-carboxamide  
**2**

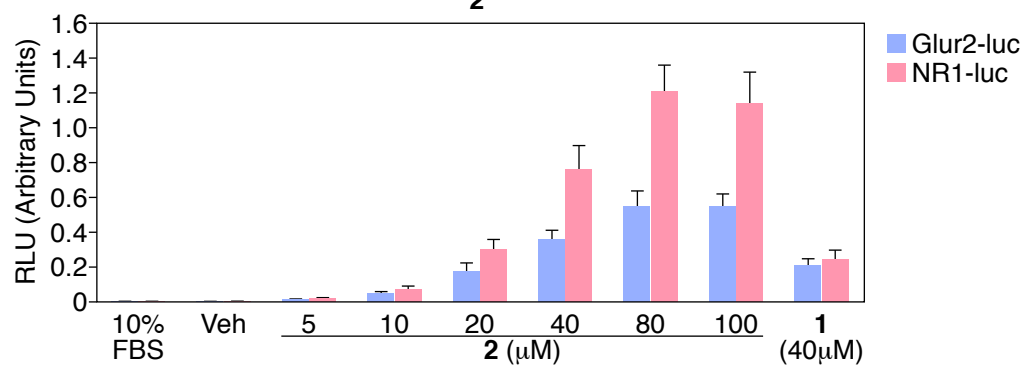

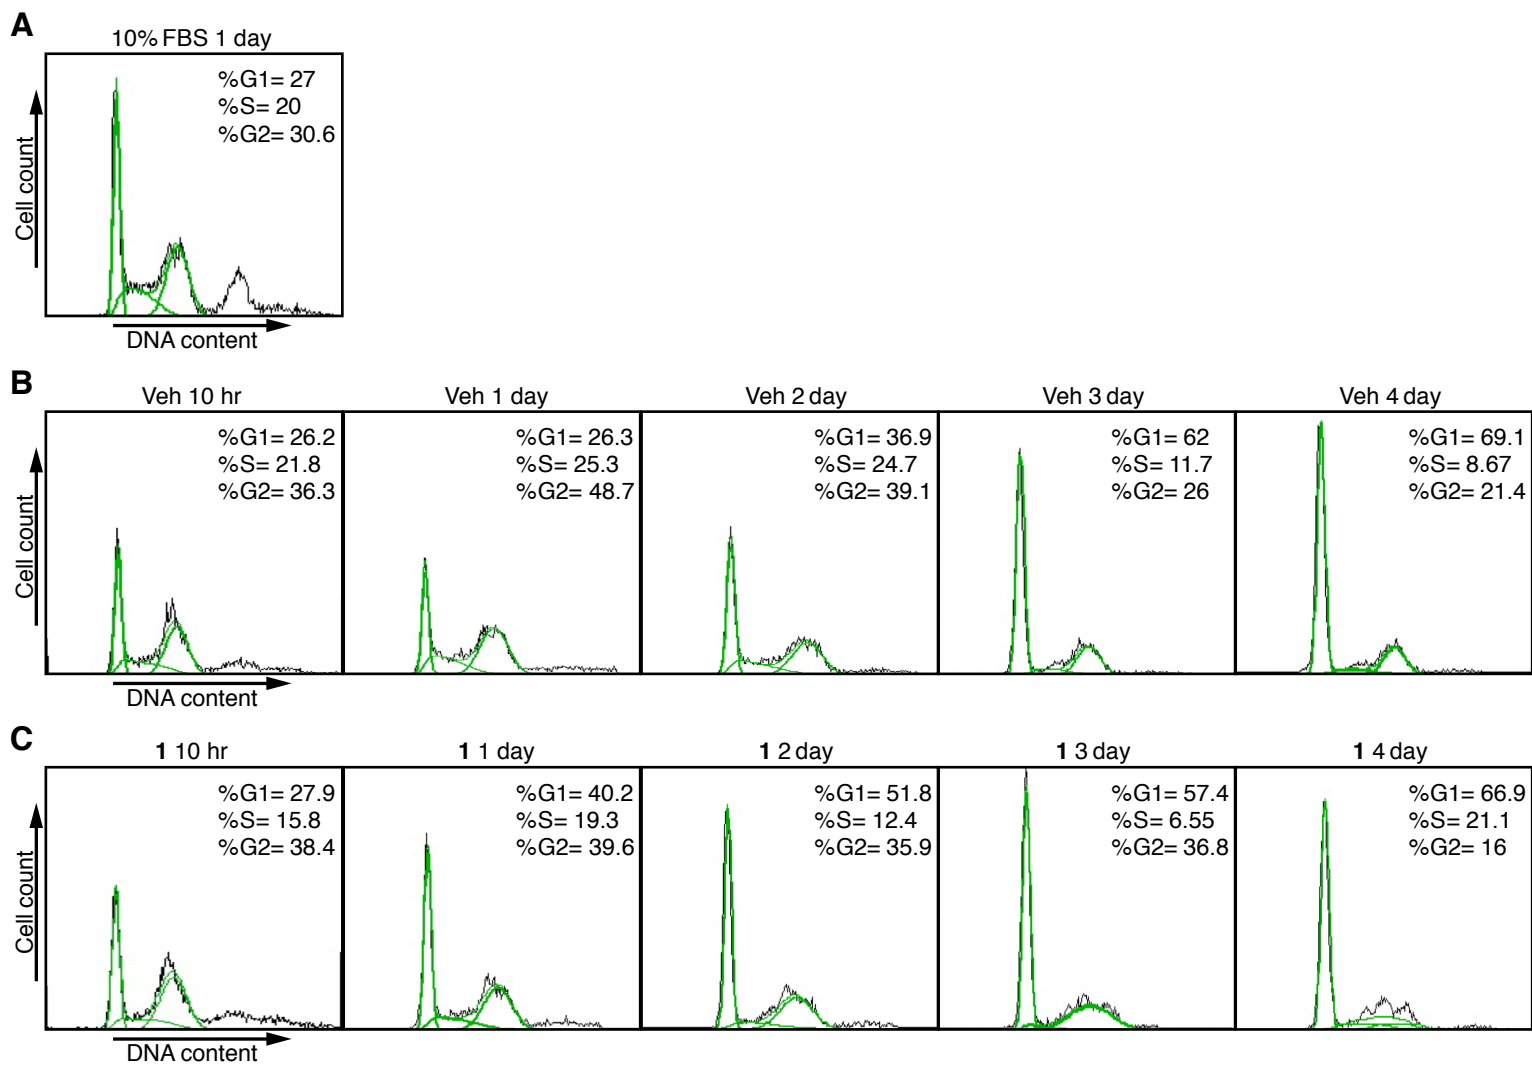

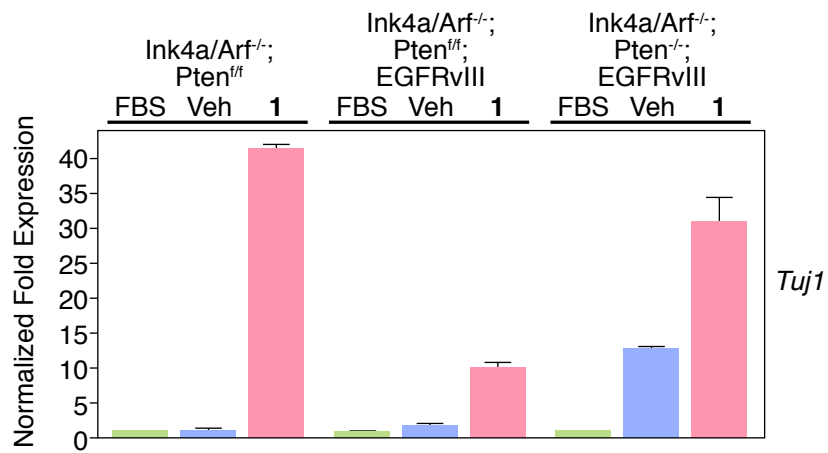

Figure S6

Supplement: NIHMS278206-supplement-03.pdf [file NIHMS278206-supplement-03.pdf]
